# Supplementary material
Source: PubMed Central journal article supplement (PMC5732856)

# Supplementary Figure S1

**A**

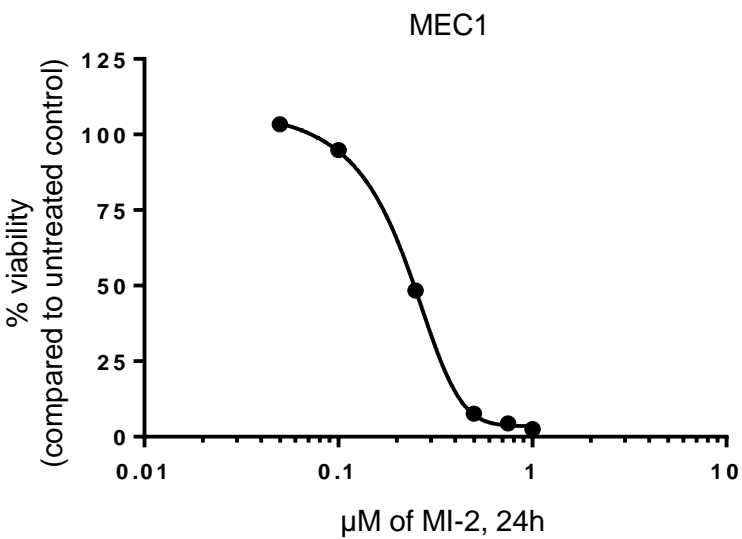

**B**

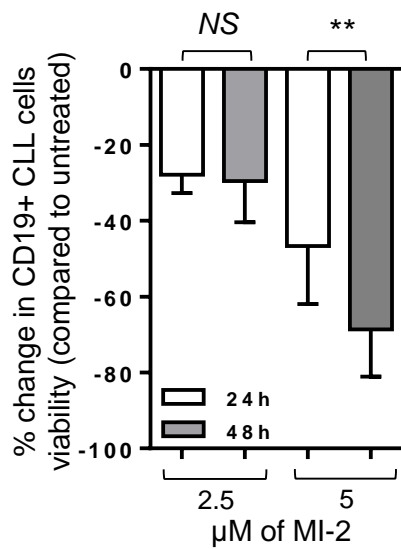

**C**

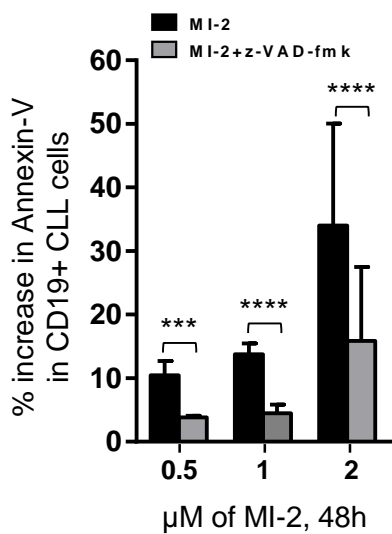

**D**

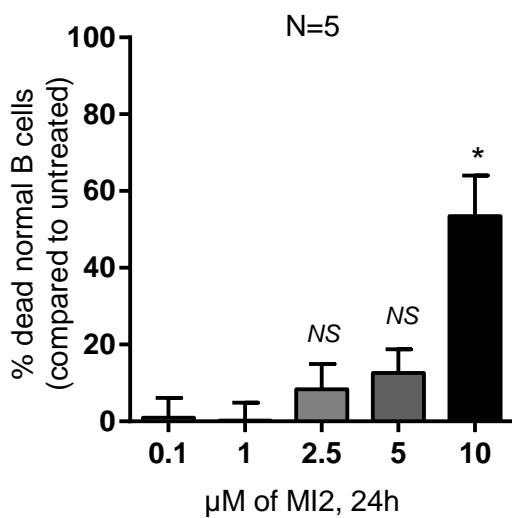

**E**

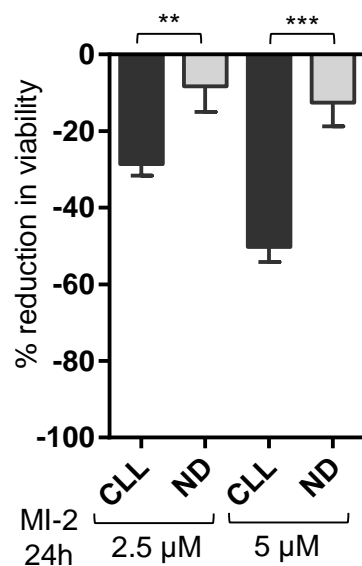

# Supplementary Figure S2

A

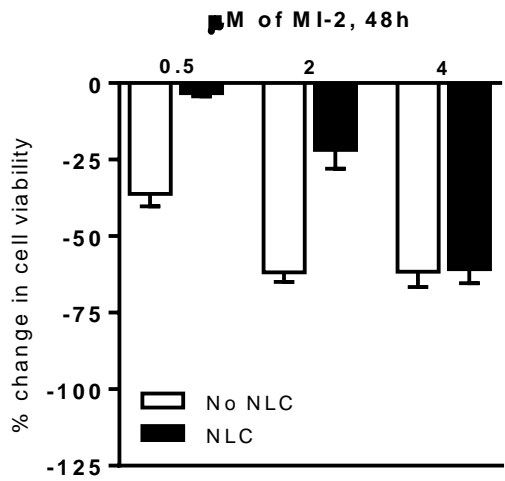

B

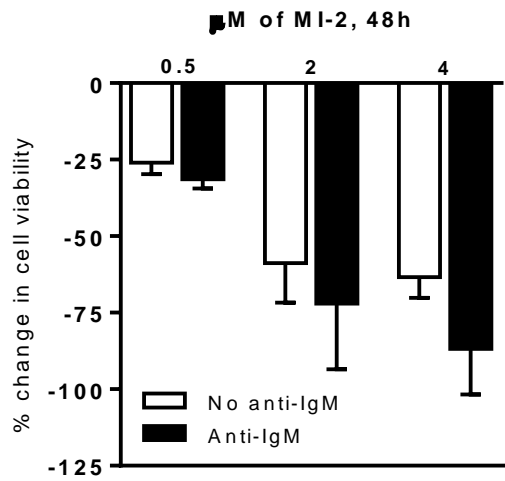

C

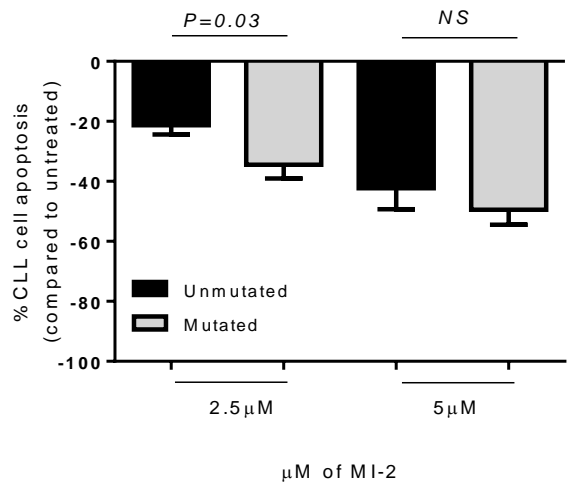

D

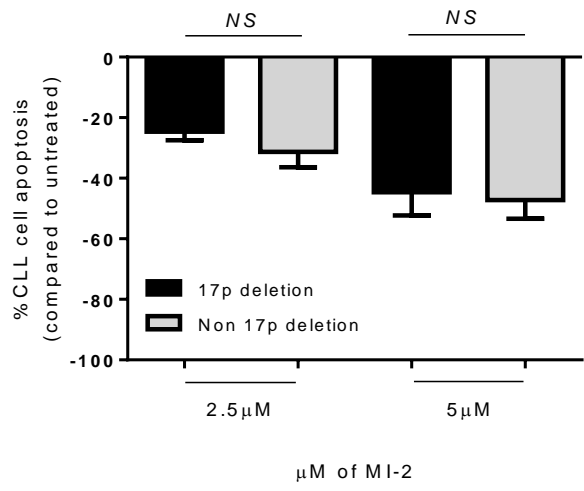

E

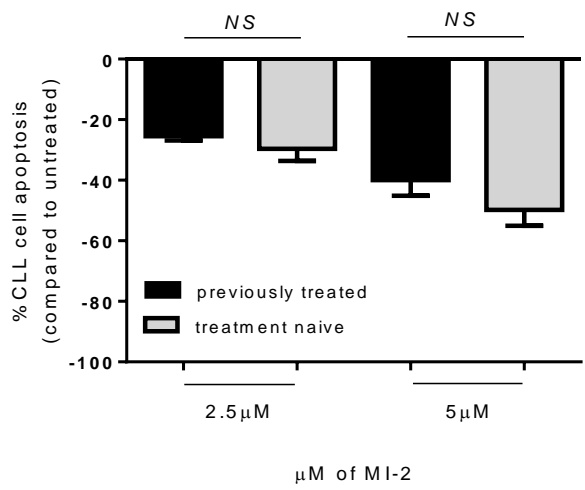

F

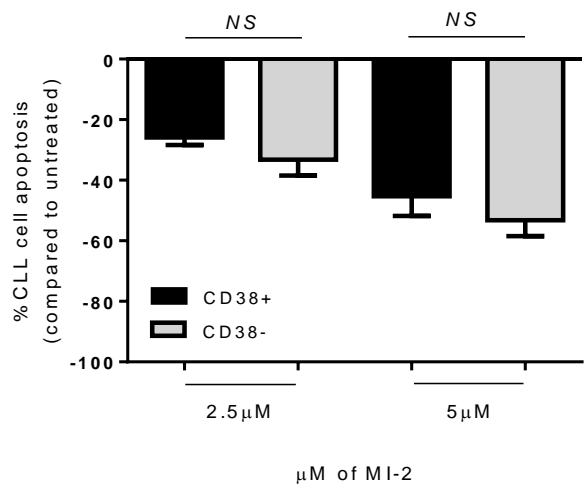

# Supplementary Figure S3

A

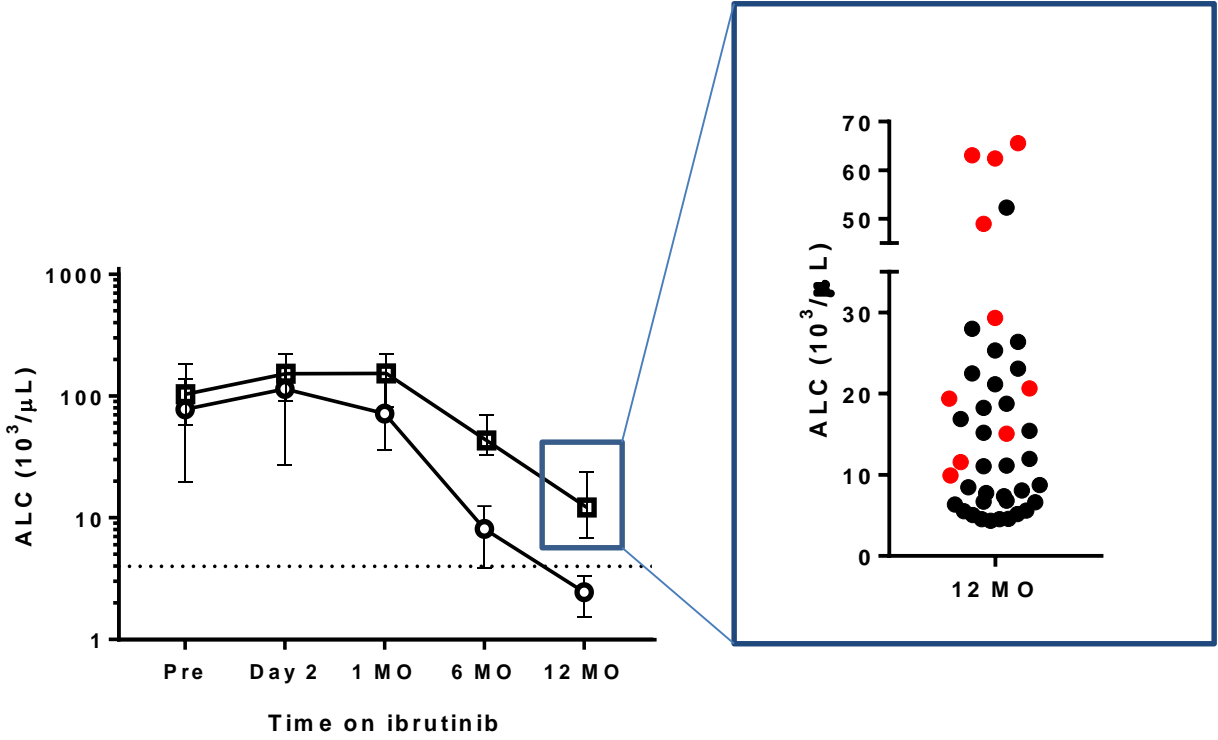

B

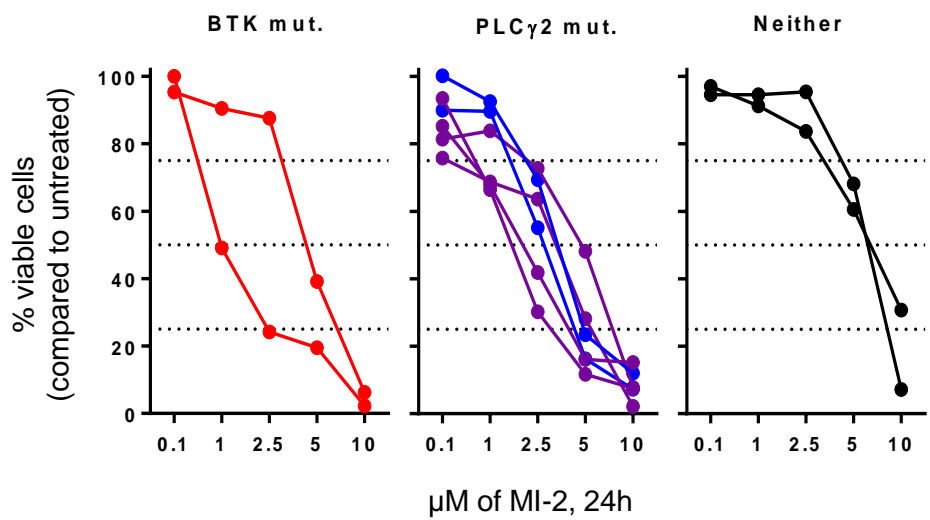

Supplement: NIHMS912152-supplement-1.pdf [file NIHMS912152-supplement-1.pdf]
